# Supplementary material for: Induced Short-Term Hearing Loss due to Stimulation of Age-Related Factors by Intermittent Hypoxia, High-Fat Diet, and Galactose Injection
Source: MDPI journal article supplement (doi:10.3390/ijms21197068), 2020-09-25
Supplement: s1 [file s1]

# **Induced Short-Term Hearing Loss due to Stimulation of Age-Related Factors by Intermittent Hypoxia, High-Fat Diet, and Galactose Injection**

**Dong Jun Park<sup>1</sup>, Sunmok Ha<sup>2</sup>, Jin Sil Choi<sup>1</sup>, Su Hoon Lee<sup>1</sup>, Jeong-Eun Park<sup>3</sup> and Young Joon Seo<sup>1,\*</sup>**

<sup>1</sup> Department of Otorhinolaryngology, Yonsei University Wonju College of Medicine, 20 Ilsan-ro, Wonju, Gangwon-do 26426, South Korea.

<sup>2</sup> Department of Biomedical Laboratory Science, College of Health Sciences, Yonsei University, wonju, Republic of Korea.

<sup>3</sup> Department of Otorhinolaryngology Head and Neck Surgery, Hallym University College of Medicine, Dongtan Sacred Heart Hospital, Hwaseong, South Korea.

\* Correspondence: okas2000@hanmail.net; Tel.: +82-33-741-0644 (Y.J.S.)

(a) Normoxic vs. hypoxic (Gal (-) vs Gal(+))

|       | Normoxic | Hypoxic |     |     |     |
|-------|----------|---------|-----|-----|-----|
| Feed  | NF       | NF      |     | HFD |     |
| G.I.  | (-)      | (-)     | (+) | (-) | (+) |
| Group | G1       | G5      | G6  | G7  | G8  |

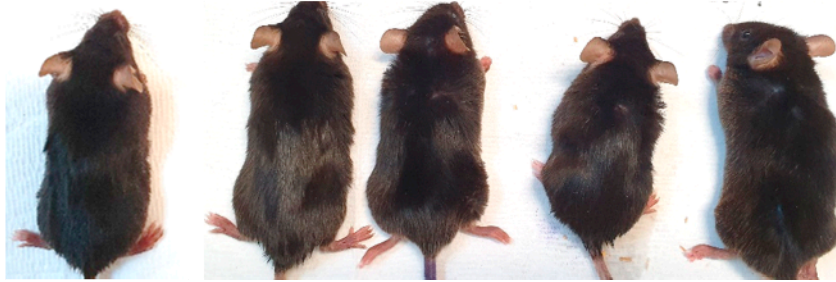

(b) NF vs. HFD

| Normoxic |     | Hypoxic |     |
|----------|-----|---------|-----|
| NF       | HFD | NF      | HFD |
| G1       | G3  | G5      | G7  |

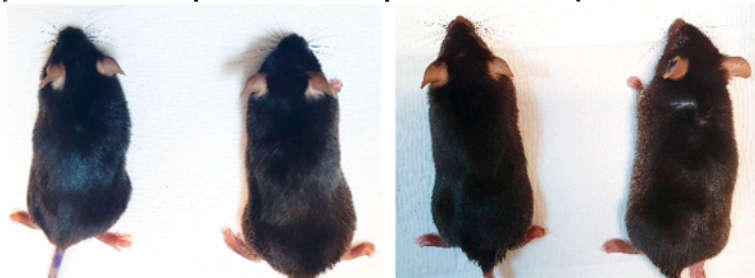

**Figure S1.** Phenotype of mice groups (HFD, GI, Hypoxic). (a) Appearance of mice of the groups based on the three conditions. (b) Appearance of mice of the groups based on NF vs HFD plus normoxia vs hypoxia.

**Abbreviations:** HFD, high-fat diet; GI, galactose injection; NF, normally feed.

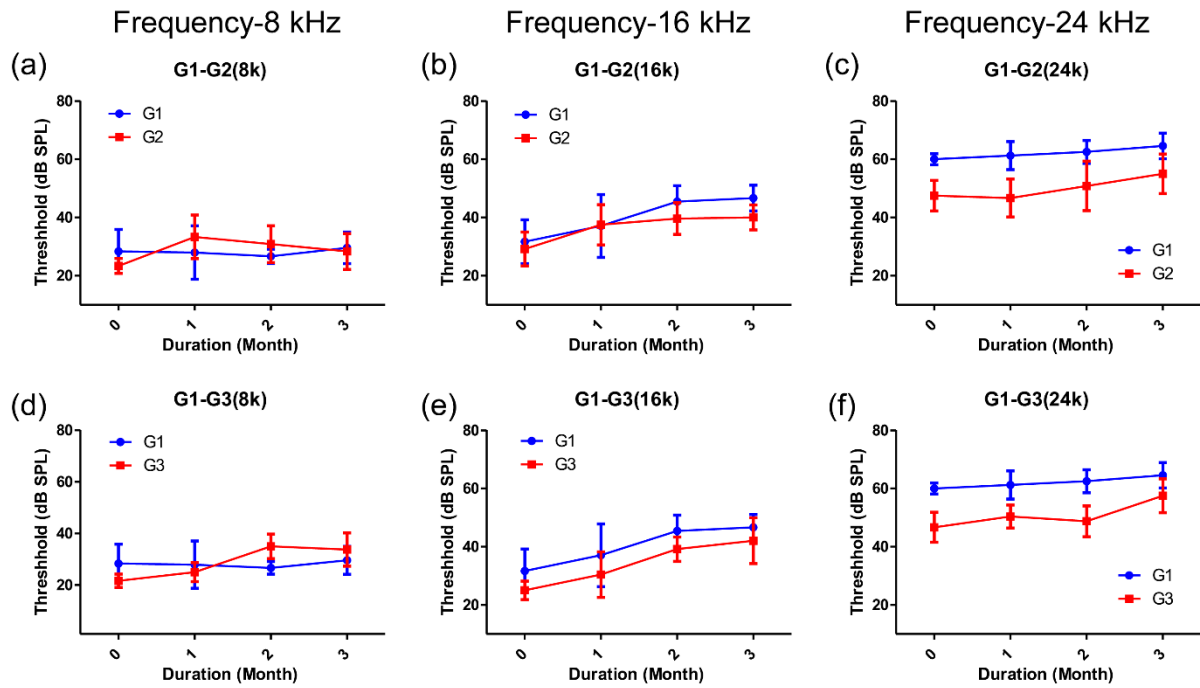

**Figure S2.** Two-way ANOVA of hearing threshold at three frequencies (8, 16, and 24 kHz) depending on the duration, respectively. (a) The average of hearing thresholds represents G1 and G2 at 8 kHz. (b) The average of hearing thresholds represents G1 and G2 at 16 kHz. (c) The average of hearing thresholds represents G1 and G2 at 24 kHz. (d) The average of hearing thresholds represents G1 and G3 at 8 kHz. (e) The average of hearing thresholds represents G1 and G3 at 16 kHz. (f) The average of hearing thresholds represents G1 and G3 at 24 kHz.

**Abbreviation:** ANOVA, analysis of variance.

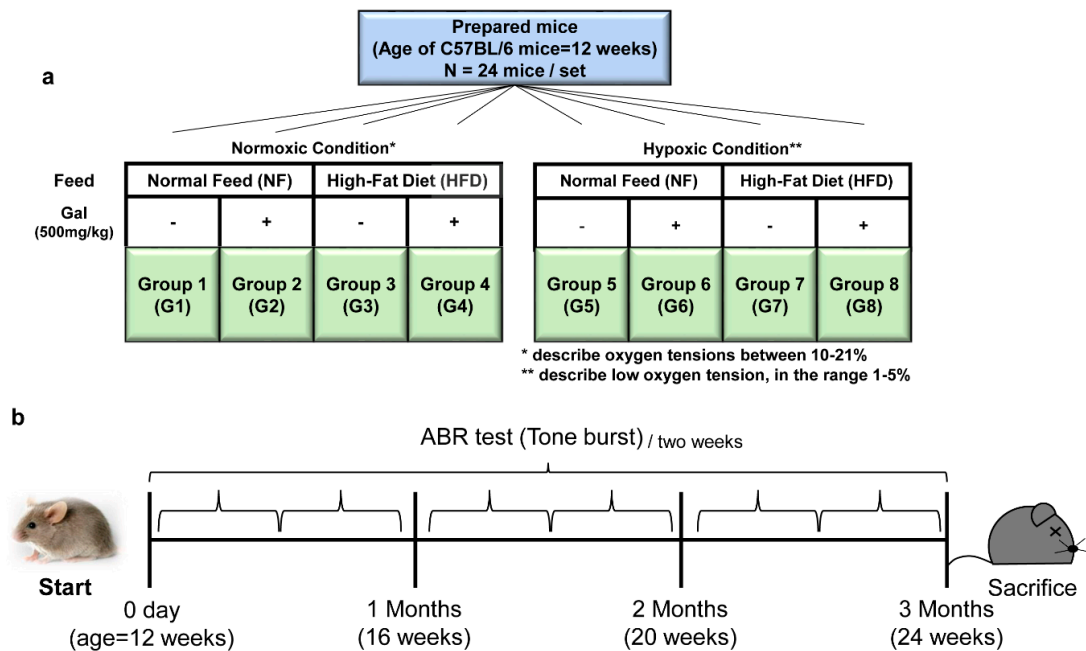

**Abbreviations:** ABR, auditory brainstem response; HFD, high-fat diet; GI, galactose injection; NF, normally fed.

**Figure S3.** Overall design, including the mouse housing conditions and ABR test. **(a)** Classification of groups based on hypoxic condition ( $\leq 5\%$ ), HFD, and GI (500 mg/kg). Mice ( $n = 72$ ) were divided into eight groups in this study. G1 (Normoxic, NF), G2 (Normoxic, NF, GI), G3 (Normoxic, HFD), G4 (Normoxic, HFD, GI), G5 (Hypoxic, NF), G6 (Hypoxic, NF, GI), G7 (Hypoxic, HFD), and G8 (Hypoxic, HFD, GI). **(b)** The ABR test for all mice was performed once every 2 weeks. Starting at 12 weeks of age, all mice were sacrificed by cervical dislocation after 3 months from when hearing loss was measured.

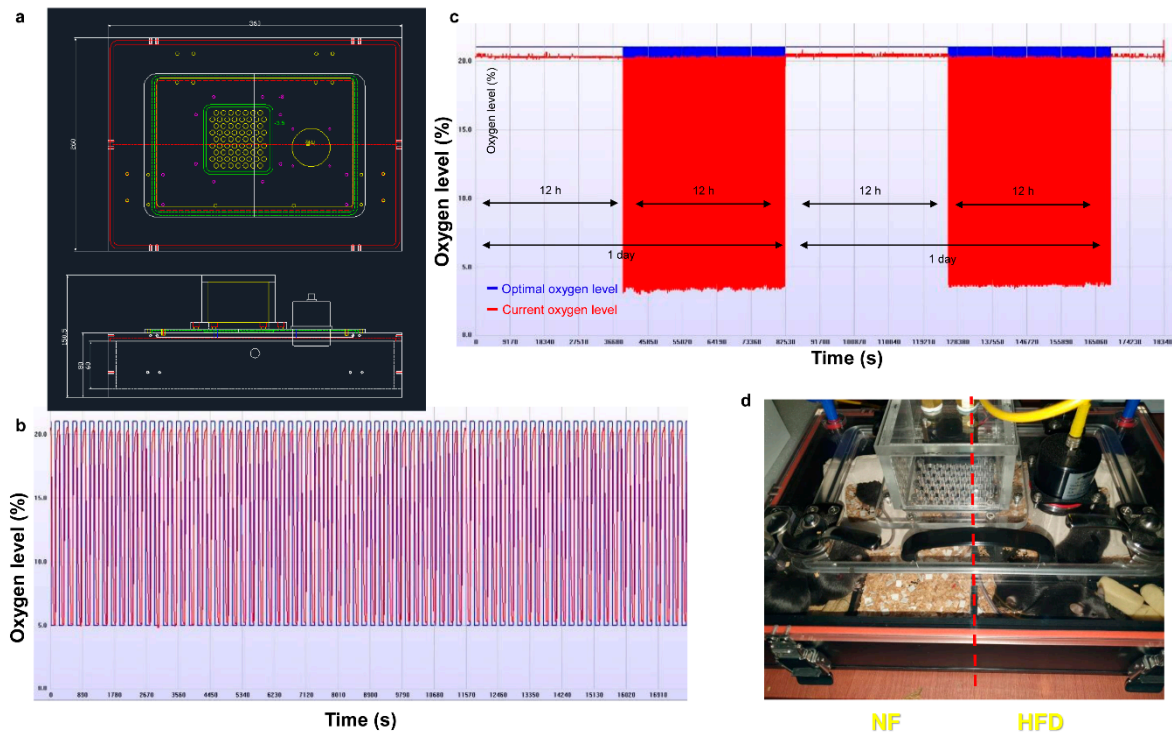

**Abbreviations:** HFD, high-fat diet; NF, normally fed.

**Figure S4.** Hypoxia chamber design for oxidative stress. **(a)** Blueprint of the hypoxia chamber for mice. **(b)** Measurement of automatic change in oxygen levels in the hypoxia chamber from 20% to 5%. The blue line represents the amount of oxygen set by the machine, and the red line represents the actual amount of oxygen. Nitrogen was automatically injected into the chamber to alter the oxygen levels. **(c)** Daily analysis of the oxygen level in the chamber. Oxygen was cycled through the chamber to achieve the hypoxic condition ( $\leq 5\%$ ) for 12 h a day and the normoxic condition (20%) for 12 h a day. **(d)** The mice were physically divided by the middle wall in the hypoxia chamber. Mice on the left side of the chamber were NF, while those on the right side were fed HFD.

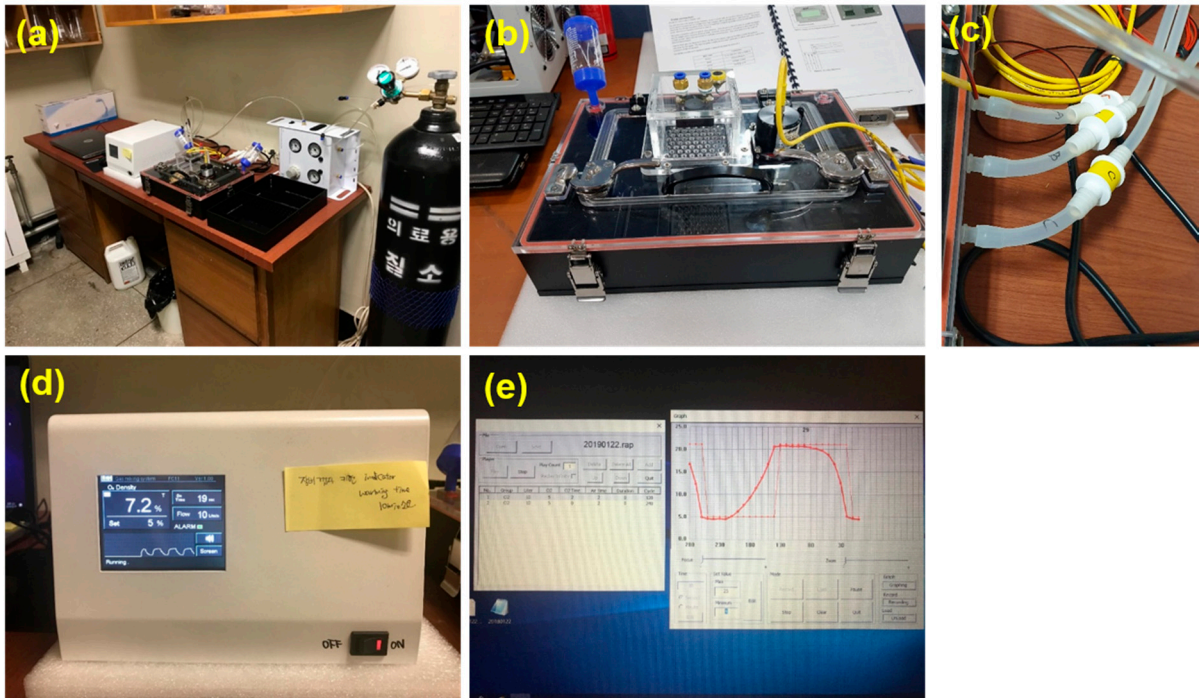

**Figure S5.** Overall appearance of the hypoxic chamber. (a) Installation of hypoxic chamber with nitrogen tank, (b) Appearance of hypoxic chamber, (c) Nitrogen injection and discharge nozzle, (d) Oxygen level meter in the hypoxic chamber, (e) Measurement of oxygen change in the hypoxic chamber.

**Table S1.** Thickness of the dermis and fat layers between different groups.

|                                | <b>WT</b>    | <b>+GI</b>  | <b>+HFD</b>  | <b>+HFD, GI</b> | <b>+Hypoxic</b> | <b>+Hypoxic,<br/>HFD, GI</b> |
|--------------------------------|--------------|-------------|--------------|-----------------|-----------------|------------------------------|
| <b>Dermis<br/>Thickness</b>    | 287.05±99.26 | 348.5±85.9  | 346.76±81.53 | 392.35±67.59    | 351.4±93.46     | 388.42±66.9                  |
| <b>Fat layer<br/>Thickness</b> | 87.59±19.76  | 127.4±29.04 | 600.29±18.18 | 594.44±18.55    | 89.71±36.00     | 133.67±36.87                 |

**Abbreviations:** WT, wild-type; HFD, high-fat diet;

**Table S2.** Ingredient Composition of High-Fat Diet 32 (HFD32).

| Ingredient Composition                                 | % per weight |
|--------------------------------------------------------|--------------|
| Milk casein                                            | 24.5         |
| Egg white                                              | 5            |
| L-cystine                                              | 0.43         |
| Powdered beef tallow<br>(including 80% of beef tallow) | 15.88        |
| Safflower oil (high oleic acid)                        | 20           |
| Crystalline Cellulose                                  | 5.5          |
| Maltodextrin                                           | 8.25         |
| Lactose                                                | 6.928        |
| Sucrose                                                | 6.75         |
| AIN93 vitamin mix                                      | 1.4          |
| AIN93G mineral mix                                     | 5            |
| Choline bitartrate                                     | 0.36         |
| Teriary butylhydroquinone                              | 0.002        |
| Total                                                  | 100          |

**Abbreviation:** HFD, high-fat diet.



**Table S3.** Ingredient composition of AIN93-VX vitamin mix and AIN93G mineral mix.**a.** Ingredient composition of AIN93-VX vitamin mix

| <i>Ingredient Composition</i>                           | <i>g per weight</i> |
|---------------------------------------------------------|---------------------|
| <i>Niacin</i>                                           | 3.0                 |
| <i>Calcium Pantothenate</i>                             | 1.6                 |
| <i>Pyridoxine HCl</i>                                   | 0.7                 |
| <i>Thiamin (81%)</i>                                    | 0.6                 |
| <i>Riboflavin</i>                                       | 0.6                 |
| <i>Folic Acid</i>                                       | 0.2                 |
| <i>Biotin</i>                                           | 0.02                |
| <i>Vitamin B12(0.1% in mannitol)</i>                    | 2.5                 |
| <i>Vitamin E, DL-alpha tocopheryl acetate (500IU/g)</i> | 15.0                |
| <i>Vitamin A Palmitate (500,000IU/g)</i>                | 0.8                 |
| <i>Vitamin D3, Cholecalciferol (500,000 IU/g)</i>       | 0.2                 |
| <i>Vitamin K1, Phylloquinone</i>                        | 0.075               |
| <i>Sucrose, fine ground</i>                             | 974.705             |
| <i>Total</i>                                            | 1000                |

**b.** Ingredient composition of AIN93G mineral mix

| <i>Ingredient Composition</i>     | <i>g per weight</i> |
|-----------------------------------|---------------------|
| <i>Calcium Carbonate</i>          | 357.0               |
| <i>Potassium Phosphate</i>        | 196.0               |
| <i>Potassium Citrate</i>          | 70.78               |
| <i>Sodium Chloride</i>            | 74.0                |
| <i>Potassium Sulfate</i>          | 46.6                |
| <i>Magnesium Oxide</i>            | 24.3                |
| <i>Ferric Citrate</i>             | 6.06                |
| <i>Zinc Carbonate</i>             | 1.65                |
| <i>Magnanous Carbonate</i>        | 0.63                |
| <i>Cupric Carbonate</i>           | 0.31                |
| <i>Potassium Iodate</i>           | 0.01                |
| <i>Sodium Selenate</i>            | 0.0103              |
| <i>Ammonium Paramolybdate</i>     | 0.008               |
| <i>Sodium Meta-Silicate</i>       | 1.45                |
| <i>Chromium Potassium Sulfate</i> | 0.275               |
| <i>Lithium Chloride</i>           | 0.0174              |
| <i>Boric acid</i>                 | 0.0815              |
| <i>Sodium Fluoride</i>            | 0.0635              |
| <i>Nickel Carbonate Hydroxide</i> | 0.0318              |
| <i>Ammonium Meta-vanadate</i>     | 0.0066              |
| <i>Sucrose</i>                    | 220.7159            |
| <i>Total</i>                      | 1000                |

**Table S4.** Ingredients and nutrient composition in experimental chows (NIH-41).

| <i>Ingredient (Unit)</i>              | <i>% per weight</i>    |
|---------------------------------------|------------------------|
| <i>Ground whole wheat</i>             | 34.9                   |
| <i>Ground No. 2 Yellow Corn</i>       | 21.0                   |
| <i>Ground whole oats</i>              | 10.0                   |
| <i>Wheat Middlings</i>                | 10.0                   |
| <i>Fish Meal (60% protein)</i>        | 9.0                    |
| <i>Soybean Meal (45% protein)</i>     | 5.0                    |
| <i>Soy Oil</i>                        | 2.0                    |
| <i>Alfalfa Meal (17% protein)</i>     | 2.0                    |
| <i>Corn gluten meal (60% protein)</i> | 2.0                    |
| <i>Dicalcium phosphate</i>            | 1.5                    |
| <i>Brewers dried east</i>             | 1.0                    |
| <i>Premixes</i>                       | 0.6                    |
| <i>Limestone</i>                      | 0.5                    |
| <i>Salt</i>                           | 0.5                    |
| <i>Amino Acid Concentration</i>       | <i>% of total diet</i> |
| <i>Arginine</i>                       | 0.9                    |
| <i>Lysine</i>                         | 0.85                   |
| <i>Methionine</i>                     | 0.35                   |
| <i>Cystine</i>                        | 0.25                   |
| <i>Tryptophan</i>                     | 0.2                    |
| <i>Glycine</i>                        | 0.95                   |
| <i>Histidine</i>                      | 0.38                   |
| <i>Leucin</i>                         | 1.4                    |
| <i>Isoleucine</i>                     | 0.95                   |
| <i>Phenylalanine</i>                  | 0.85                   |
| <i>Tyrosine</i>                       | 0.6                    |
| <i>Threonine</i>                      | 0.65                   |
| <i>Valine</i>                         | 0.9                    |
| <i>Glycine</i>                        | 0.95                   |
| <i>Mineral Concentration (Unit)</i>   | <i>per weight</i>      |
| <i>Calcium (%)</i>                    | 1                      |
| <i>Phosphorous (%)</i>                | 0.94                   |
| <i>Potassium (%)</i>                  | 0.55                   |
| <i>Sodium (%)</i>                     | 0.25                   |
| <i>Magnesium (%)</i>                  | 0.15                   |
| <i>Iron (ppm)</i>                     | 300                    |
| <i>Zinc (ppm)</i>                     | 40                     |

|                                     |                   |
|-------------------------------------|-------------------|
| <i>Manganese (ppm)</i>              | 140               |
| <i>Copper (ppm)</i>                 | 12                |
| <i>Cobalt (ppm)</i>                 | 0.7               |
| <i>Iodine (ppm)</i>                 | 1.8               |
| <i>Vitamin Concentration (Unit)</i> | <i>per weight</i> |
| <i>Vitamin A (IU/g)</i>             | 17                |
| <i>Vitamin D3 (IU/g)</i>            | 4                 |
| <i>Alpha-Tocopherol (IU/g)</i>      | 45                |
| <i>Thiamine (ppm)</i>               | 15                |
| <i>Riboflavin (ppm)</i>             | 9                 |
| <i>Niacin (ppm)</i>                 | 70                |
| <i>Pantothenic Acid (ppm)</i>       | 30                |
| <i>Choline (ppm)</i>                | 1900              |
| <i>Folic Acid (ppm)</i>             | 2                 |
| <i>Biotin (ppm)</i>                 | 2                 |
| <i>Vitamin B12 (Mcg/kg)</i>         | 75                |
| <i>Vitamin K (ppm)</i>              | 2                 |

**Table S5.** Compared guaranteed analysis between NIH41 and HFD32 (%).

| Guaranteed Analysis    | NIH-41 | HFD32 |
|------------------------|--------|-------|
| Moisture with vitamins | 36.9   | 6.2   |
| Crude Protein          | 18.0   | 25.5  |
| Crude Fat              | 5.0    | 32.0  |
| Crude Fiber            | 5.0    | 2.9   |
| Ash (%)                | 35.1   | 4.0   |
| NFE (%)                | -      | 29.4  |
| Total                  | 100    | 100   |

**Abbreviation:** NFE, nitrogen-free extract

**Table S6.** Primers of target genes for aging.

| <b>Target gene</b> | <b>Predicable<br/>Dysfunctional effect</b>          | <b>F/R</b> | <b>5' → 3'</b>             |
|--------------------|-----------------------------------------------------|------------|----------------------------|
| <i>ApoE</i>        | Age-related disorders,<br>Vascular disease          | F          | GGT TCG AGC CAA TAG TGG AA |
|                    |                                                     | R          | ATG GAT GTT GTT GCA GGA CA |
| <i>Edn1</i>        | Cardiovascular<br>complications                     | F          | ACA CCG TCC TCT TCG TTT TG |
|                    |                                                     | R          | GAG TC CTT GGA AAG TCA CG  |
| <i>Ucp2</i>        | Mitochondria<br>dysfunction                         | F          | CTC AAA GCA GCC TCC AGA AC |
|                    |                                                     | R          | ACA TCT GTG GCC TTG AAA CC |
| <i>Cdh23</i>       | Age-related<br>hearing loss                         | F          | ATG GAG AGC CCT CTG GAA AT |
|                    |                                                     | R          | ACC CAC AAA GGC TGT ACT GG |
| <i>Kcnq4</i>       | Non-syndromic<br>sensorineural hearing<br>loss      | F          | TGT TGG GAT CCG TGG TCT AT |
|                    |                                                     | R          | GAGTTG GCA TCC TTC TCA GC  |
| <i>Myo7a</i>       | Non-syndromic hearing<br>loss and deafness          | F          | GAC AAC TCT AGC CGC TTT GG |
|                    |                                                     | R          | GAC ACG TGA CTT CTC CAG CA |
| <i>Myo6</i>        | Non-syndromic hearing<br>loss and deafness          | F          | AGA CCA CTT CCG GCT CAC TA |
|                    |                                                     | R          | TGG GTT GTC TCG TAG CAC AC |
| <i>Slc26a4</i>     | Anion transport<br>dysfunction in auditory<br>organ | F          | TCA TTG CCT TTG GGA TAA GC |
|                    |                                                     | R          | GGC AAC CAT CAC AAT CAC AG |
| <i>18s</i>         | Ribosomal RNA                                       | F          | CAT TCG AAC GTC TGC CCT AT |
|                    |                                                     | R          | GTT TCT CAG GCT CCC TCT CC |
